# Supplementary material for: New Insight into Aspartate Metabolic Pathways in Populus: Linking the Root Responsive Isoenzymes with Amino Acid Biosynthesis during Incompatible Interactions of Fusarium solani
Source: MDPI journal article supplement (doi:10.3390/ijms23126368), 2022-06-07
Supplement: s1 [file s1]

# New Insight into Aspartate Metabolic Pathways in *Populus*: Linking the Root Responsive Isoenzymes with Amino Acid Biosynthesis during Incompatible Interactions of *Fusarium solani*

Mei Han<sup>1†</sup>, Xianglei Xu<sup>1,2†</sup>, Xue Li<sup>1,2†</sup>, Mingyue Xu<sup>1</sup>, Mei Hu<sup>1,3</sup>, Yuan Xiong<sup>1,2</sup>, Junhu Feng<sup>1</sup>, Hao Wu<sup>1,2</sup>, Hui Zhu<sup>1,2</sup> and Tao Su<sup>1,2\*</sup>

## Supplementary Material

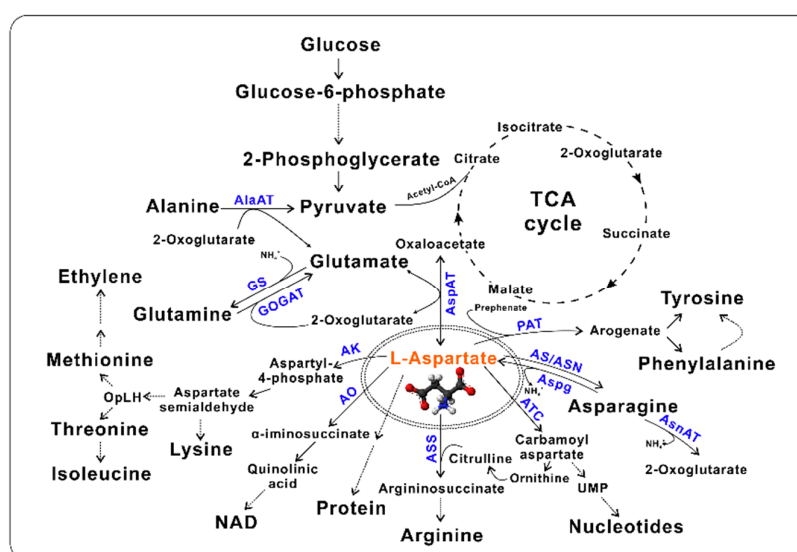

**Figure S1.** Schematic model representing the central metabolites intermediated by Asp metabolic pathways in plants. PAT, prephenate aminotransferase; TCA cycle, tricarboxylic acid cycle; NAD, nicotinamide adenine dinucleotide; UMP, uridine monophosphate.

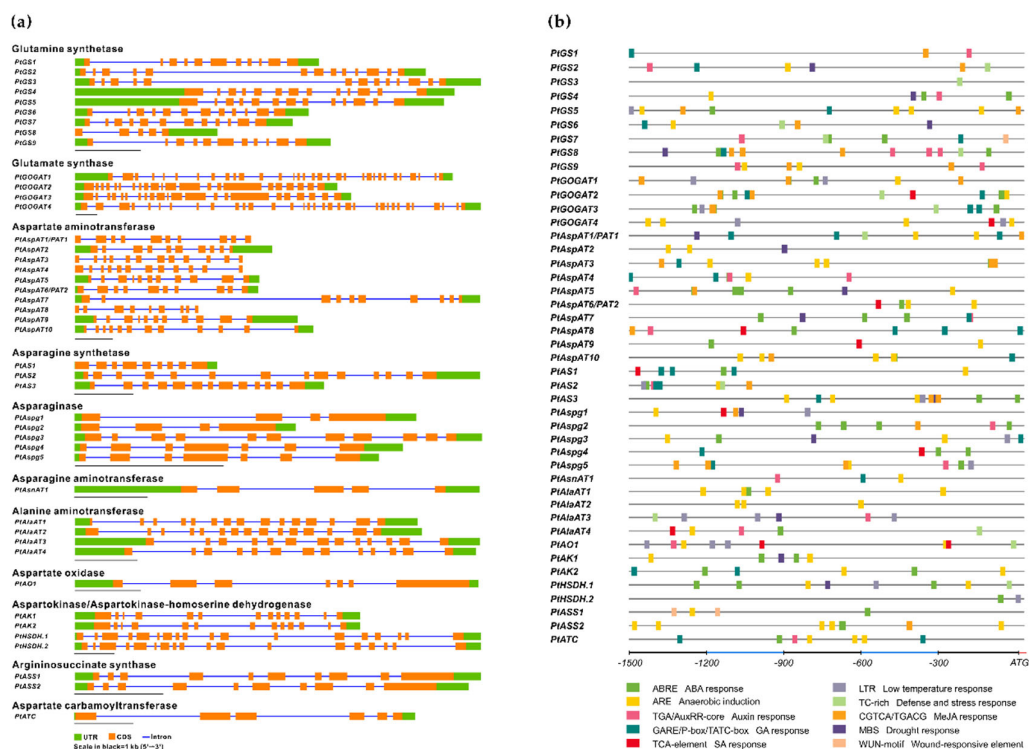

**Figure S2.** Genomic structures and *in silico* prediction of the *cis*-regulatory elements in gene promoters. (a) Genomic structures show the patterns of the exon/intron organization. The exon lengths are displayed proportionally to the scale on the bottom. (b) The various *cis*-regulatory elements were boxed in colors.

**Table S1.** List of isoenzymes involved in aspartate (Asp) metabolic pathways in *P. trichocarpa*.

| Enzyme <sup>1</sup> | Gene (v3.1)       | Name                  | Gene (bp) | ORF (bp) | Size (a.a) | MW (kDa) | PI   | Target <sup>2</sup> | <i>A.thaliana</i> | Name          |
|---------------------|-------------------|-----------------------|-----------|----------|------------|----------|------|---------------------|-------------------|---------------|
| GLN/GS              | Potri.004G085400  | <i>PtGS1/PtGS1.1a</i> | 3321      | 1071     | 356        | 39.26    | 5.52 | Cyto                | AT1G48470         | <i>GLN1;5</i> |
|                     | Potri.005G093200  | <i>PtGS2/PtGS1.2a</i> | 4777      | 1071     | 356        | 39.06    | 5.14 | Cyto                | AT1G66200         | <i>GLN1;2</i> |
|                     | Potri.007G069600  | <i>PtGS3/PtGS1.2b</i> | 5537      | 1071     | 356        | 38.99    | 5.53 | Cyto                | AT3G17820         | <i>GLN1;3</i> |
|                     | Potri.008G200100  | <i>PtGS4/PtGS2a</i>   | 5169      | 1299     | 432        | 47.75    | 6.48 | Plastid             | AT5G16570         | <i>GLN1;4</i> |
|                     | Potri.010G029100  | <i>PtGS5/PtGS2b</i>   | 5029      | 1299     | 432        | 47.89    | 6.48 | Plastid             | AT5G35630         | <i>GLN2</i>   |
|                     | Potri.012G043900  | <i>PtGS6/PtGS1.3a</i> | 3227      | 1071     | 356        | 39.12    | 5.86 | Cyto                | AT5G37600         | <i>GLN1;1</i> |
|                     | Potri.015G034700  | <i>PtGS7/PtGS1.3b</i> | 2964      | 1071     | 356        | 39.22    | 5.81 | Cyto                |                   |               |
|                     | Potri.017G127300* | <i>PtGS8</i>          | 1942      | 492      | 163        | 18.04    | 8.35 | Cyto                |                   |               |
| GLU/GOGAT           | Potri.017G131100  | <i>PtGS9/PtGS1.1b</i> | 3485      | 1071     | 356        | 39.22    | 5.95 | Cyto                |                   |               |
|                     | Potri.006G038400  | <i>PtGOGAT1</i>       | 15954     | 4476     | 1491       | 162.70   | 5.85 | Plastid             | AT2G41220         | <i>GLU2</i>   |
|                     | Potri.012G011700  | <i>PtGOGAT2</i>       | 11095     | 6687     | 2228       | 243.90   | 6.48 | Plastid             | AT5G04140         | <i>GLU1</i>   |
|                     | Potri.015G017500  | <i>PtGOGAT3</i>       | 11684     | 6687     | 2228       | 244.10   | 6.15 | Plastid             | AT5G53460         | <i>GLT1</i>   |
|                     | Potri.016G036900  | <i>PtGOGAT4</i>       | 17137     | 4863     | 1620       | 176.53   | 6.41 | Plastid             |                   |               |
| AspAT               | Potri.005G079200  | <i>PtAspAT1/PAT1</i>  | 4021      | 1443     | 480        | 51.59    | 7.11 | Plastid             | AT1G62800         | <i>ASP4</i>   |
|                     | Potri.006G107100  | <i>PtAspAT2</i>       | 4501      | 1269     | 422        | 46.96    | 7.19 | Mito                | AT2G22250         | <i>PAT</i>    |
|                     | Potri.006G241500  | <i>PtAspAT3</i>       | 3832      | 1266     | 421        | 46.56    | 6.50 | Cyto                | AT2G30970         | <i>ASP1</i>   |
|                     | Potri.006G241600  | <i>PtAspAT4</i>       | 3829      | 1350     | 449        | 49.18    | 9.16 | Cyto                | AT4G31990         | <i>ASP5</i>   |
|                     | Potri.006G260200  | <i>PtAspAT5</i>       | 4211      | 1401     | 466        | 51.03    | 8.67 | Plastid             | AT5G11520         | <i>ASP3</i>   |
|                     | Potri.T079800**   | <i>PtAspAT6/PAT2</i>  | 4159      | 1446     | 481        | 51.89    | 8.06 | Plastid             | AT5G19550         | <i>ASP2</i>   |

|            |                   |                  |      |      |     |        |      |         |           |        |
|------------|-------------------|------------------|------|------|-----|--------|------|---------|-----------|--------|
|            | Potri.014G143300  | <i>PtAspAT7</i>  | 9230 | 1287 | 428 | 47.79  | 8.35 | Mito    |           |        |
|            | Potri.016G133000* | <i>PtAspAT8</i>  | 2806 | 915  | 304 | 33.11  | 5.66 | Cyto    |           |        |
|            | Potri.018G022200  | <i>PtAspAT9</i>  | 5060 | 1401 | 466 | 50.92  | 8.67 | Plastid |           |        |
|            | Potri.018G082500  | <i>PtAspAT10</i> | 5417 | 1224 | 407 | 44.47  | 7.72 | Cyto    |           |        |
| AS/ASN     | Potri.001G278400  | <i>PtAS1</i>     | 2272 | 1338 | 445 | 49.77  | 6.58 | Cyto    | AT3G47340 | ASN1   |
|            | Potri.005G075700  | <i>PtAS2</i>     | 6490 | 1755 | 584 | 65.64  | 6.39 | Cyto    | AT5G10240 | ASN3   |
|            | Potri.009G072900  | <i>PtAS3</i>     | 3969 | 1770 | 589 | 66.07  | 6.00 | Cyto    | AT5G65010 | ASN2   |
| Aspg       | Potri.002G122900  | <i>PtAspg1</i>   | 3038 | 987  | 328 | 34.68  | 4.69 | Cyto    | AT3G16150 | ASPGB1 |
|            | Potri.014G022900  | <i>PtAspg2</i>   | 1967 | 987  | 328 | 34.60  | 4.81 | Per     | AT5G08100 | ASPGA1 |
|            | Potri.014G080600  | <i>PtAspg3</i>   | 3622 | 1260 | 419 | 43.71  | 6.03 | Cyto    |           |        |
|            | Potri.014G191600  | <i>PtAspg4</i>   | 2919 | 1077 | 358 | 37.90  | 6.14 | ER      |           |        |
|            | Potri.014G191900  | <i>PtAspg5</i>   | 2705 | 1077 | 358 | 37.93  | 6.14 | Extra   |           |        |
| AsnAT      | Potri.001G253300  | <i>PtAsnAT1</i>  | 5120 | 1206 | 401 | 44.08  | 8.59 | Per     | AT2G13360 | AGT1   |
| AlaAT      | Potri.001G162800  | <i>PtAlaAT1</i>  | 5087 | 1446 | 481 | 52.98  | 6.25 | Per     | AT1G17290 | ALAAT1 |
|            | Potri.003G072600  | <i>PtAlaAT2</i>  | 5155 | 1602 | 533 | 58.27  | 5.77 | Mito    | AT1G72330 | ALAAT2 |
|            | Potri.008G187400  | <i>PtAlaAT3</i>  | 6013 | 1446 | 481 | 53.37  | 5.99 | Per     | AT1G23310 | GGT1   |
|            | Potri.010G045100  | <i>PtAlaAT4</i>  | 5953 | 1446 | 481 | 53.48  | 6.92 | Per     | AT1G70580 | GGT2   |
| AO         | Potri.001G348600  | <i>PtAO1</i>     | 5603 | 1953 | 650 | 71.70  | 6.40 | Plastid | AT5G14760 | AO     |
| AK/AK-HSDH | Potri.002G236800  | <i>PtAK1</i>     | 6690 | 1674 | 557 | 61.05  | 5.72 | Plastid | AT3G02020 | AK3    |
|            | Potri.014G145700  | <i>PtAK2</i>     | 6860 | 1686 | 561 | 61.71  | 5.69 | Plastid | AT5G13280 | AK1    |
|            | Potri.013G099500  | <i>PtHSDH.1</i>  | 9727 | 2769 | 922 | 100.80 | 6.94 | Plastid | AT5G14060 | AK2    |
|            | Potri.019G071700  | <i>PtHSDH.2</i>  | 9535 | 2751 | 916 | 100.33 | 6.70 | Plastid | AT1G31230 | HSDH1  |
|            |                   |                  |      |      |     |        |      |         | AT4G19710 | HSDH2  |
| ASS        | Potri.008G020200  | <i>PtASS1</i>    | 4278 | 1485 | 494 | 54.25  | 6.31 | Plastid | AT4G24830 | ASS    |
|            | Potri.010G239000  | <i>PtASS2</i>    | 4140 | 1485 | 494 | 54.35  | 6.45 | Plastid |           |        |
| ATC        | Potri.001G357200  | <i>PtATC</i>     | 5200 | 1155 | 384 | 42.94  | 6.78 | Plastid | AT3G20330 | ATC    |

<sup>1</sup> glutamine synthetase (GLN/GS), glutamate synthase (GLU/GOGAT), Asp aminotransferase (AspAT), asparagine synthetase (AS/ASN), asparaginase (Aspg), asparagine aminotransferase (AsnAT), alanine aminotransferase (AlaAT), Asp oxidase (AO), aspartokinase/aspartokinase-homoserine dehydrogenases (AK/AK-HSDH), argininosuccinate synthase (ASS), Asp transcarbamoylase/carbamoyltransferase (ATC).

<sup>2</sup> cytoplasm (Cyto), extracellular (Extra), mitochondrion (Mito), plastid, endoplasmic reticulum (ER), and peroxisome (Per). \* Genes ID only present in v3.0, \*\* The ID is updated to Potri.007G088426 in v4.1.

**Table S2.** The number of annotated compounds classified by families upon *F. solani* infection in roots.

| Chemical Family                           | Number of annotated compounds |          |           |
|-------------------------------------------|-------------------------------|----------|-----------|
|                                           | 48/0 hpi                      | 72/0 hpi | 72/48 hpi |
| Carbohydrates and carbohydrate conjugates | 70                            | 56       | 15        |
| Flavonoid glycosides                      | 61                            | 38       | 7         |
| Triterpenoids                             | 45                            | 13       | 11        |
| Terpenoids (mono, di, and sesqui)         | 28                            | 21       | 4         |
| Amino acids, peptides, and analogues      | 26                            | 24       | 9         |
| Flavans                                   | 18                            | 8        | 5         |
| Fatty acid-related                        | 13                            | 16       | 5         |
| Stilbene glycosides                       | 12                            | 10       | 1         |
| Biflavonoids and polyflavonoids           | 11                            | 12       | 3         |
| Furanocoumarins                           | 9                             | 5        | 1         |
| Hydroxycinnamic acids and derivatives     | 8                             | 8        | 1         |
| Amines                                    | 6                             | 6        | 1         |

**Table S3.** Statistical list of variable annotated amino acids and derivatives.

| Compound                          | KEGG/PubChem ID | log2FC<br>(72/0 hpi) | log2FC<br>(48/0 hpi) | log2FC<br>(72/48hpi) |
|-----------------------------------|-----------------|----------------------|----------------------|----------------------|
| 3-amino-2-piperidone              |                 | -0.959242085         | -1.287624277         | ND                   |
| Acetylhomoserine                  |                 | 0.413502763          | 0.289123839          | ND                   |
| Citrulline                        | C00327          | ND                   | -0.965678271         | 0.72762098           |
| gamma-Glutamylaspartic acid       |                 | 0.811968258          | 0.980476886          | ND                   |
| Glycine                           |                 | 0.93688711           | 0.9762432            | ND                   |
| Glycylglycylglycine               |                 | 12.07483783          | ND                   | 3.245442267          |
| L-2-Amino-5-hydroxypentanoic acid |                 | 1.31739572           | 1.134765593          | ND                   |
| L-alpha-Aminobutyric acid         | C02356          | 2.484660714          | 1.96971639           | ND                   |
| L-Asparagine                      | C00152          | -1.39960787          | -1.040911987         | ND                   |
| L-asparagine                      |                 | -2.243842063         | -1.406524372         | ND                   |
| L-Glutamic acid                   | C00025          | 0.871826199          | 0.70855538           | ND                   |
| L-Isoleucine                      | C00407          | ND                   | 0.347996561          | -0.695894603         |
| L-Oxalylalibizziine               |                 | 0.580167883          | 0.415950772          | ND                   |
| L-proline                         |                 | 1.334475436          | 1.356375227          | ND                   |
| L-threonine                       |                 | ND                   | 0.82296079           | -0.535254662         |
| Lycoperdic acid                   |                 | 1.381155267          | 1.455909502          | ND                   |
| Ornithine                         |                 | ND                   | -1.234841524         | 0.559956343          |
| S-Methylmethionine                |                 | 5.031482626          | ND                   | 1.952267173          |

**Table S4.** List of primers used for qRT-PCR analyses.

| Primer Name       | Sequence                 | Access number/Gene                   |
|-------------------|--------------------------|--------------------------------------|
| <i>β-Actin_qF</i> | GACCTTCAATGTGCCTGCAA     | Potri.019G006700.1/ <i>Ptβ-Actin</i> |
| <i>β-Actin_qR</i> | ACCATCACCAGAATCCAGCA     |                                      |
| <i>EF1α_qF</i>    | TCCGTCTTCCACTTCAGGATGTCT | Potri.006G130900.1/ <i>PtEF1α</i>    |
| <i>EF1α_qR</i>    | GTCACGACCATAACCAGGCTTCAG |                                      |
| <i>UBIC_qF2</i>   | TTGCTTGAGGAACCTGAAC      | Potri.006G205700.7/ <i>PtUBIC</i>    |
| <i>UBIC_qR2</i>   | GTGAGGACCGATTACAGT       |                                      |
| <i>qFW113</i>     | CGCATCAGCTATAAAAGAAGCAC  | Potri.004G085400/ <i>PtGS1</i>       |
| <i>qRV113</i>     | TCTCAGTGGAGTCTGAGAGGTT   |                                      |
| <i>qFW114</i>     | AAATGCCAGTGTGGCTGTTG     | Potri.005G093200/ <i>PtGS2</i>       |
| <i>qRV114</i>     | TGAAAAATGCAGAGAATTGTGACT |                                      |
| <i>qFW116</i>     | CTCCTTGACTTTGGGGATGC     | Potri.007G069600/ <i>PtGS3</i>       |
| <i>qRV116</i>     | TCCAAGTCAATGCCACCTTAT    |                                      |
| <i>qFW117</i>     | CCCGTGGATGAAAAGGCTCT     |                                      |

|                      |                          |                                        |
|----------------------|--------------------------|----------------------------------------|
| <i>qRV117</i>        | TTCCACACAAGGCCAAGGAA     | Potri.008G200100/ <i>PtGS4</i>         |
| <i>qFW118</i>        | ATCAGCATAACAAGGGCGACA    | Potri.010G029100/ <i>PtGS5</i>         |
| <i>qRV118</i>        | CCCCGTGTTTGGGGATTAAGA    |                                        |
| <i>qFW119</i>        | TTCAGCTGTACCTTCGAGCC     | Potri.012G043900/ <i>PtGS6</i>         |
| <i>qRV119</i>        | TCGACGGTGAAGGCGTTTA      |                                        |
| <i>qFW120</i>        | ATGATTGTCCTCCGTTCCCTG    | Potri.015G034700/ <i>PtGS7</i>         |
| <i>qRV120</i>        | CTACCAAACACACCCACCCTT    |                                        |
| <i>qFW121</i>        | AGCGTGGTCTGAGGCATATC     | Potri.017G127300*/ <i>PtGS8</i>        |
| <i>qRV121</i>        | CGATTAGCAACCCCCGTTTG     |                                        |
| <i>qFW122</i>        | TCTTCAACAATAATCCGCCCT    | Potri.017G131100/ <i>PtGS9</i>         |
| <i>qRV122</i>        | AAGGTCTGAAAGCAACGACAT    |                                        |
| <i>qFW123</i>        | GTGCATCATTGAGGCAACC      | Potri.006G038400/ <i>PtGOGAT1</i>      |
| <i>qRV123</i>        | CGAATTCGGGTTTTCCGGC      |                                        |
| <i>qFW124</i>        | TGCTTATGAGCGTGAAGGTGT    | Potri.012G011700/ <i>PtGOGAT2</i>      |
| <i>qRV124</i>        | AGGGCATCCCCAGTTTTCTC     |                                        |
| <i>qFW125</i>        | GCTCATTTGGTAGTTGTTGAGGA  | Potri.015G017500/ <i>PtGOGAT3</i>      |
| <i>qRV125</i>        | GCTAAACCACAAGGCACAACG    |                                        |
| <i>qFW126</i>        | ACATCACCCAAGAGCATCCC     | Potri.016G036900/ <i>PtGOGAT4</i>      |
| <i>qRV126</i>        | GTCCTGGGTGTGTTCAGCAT     |                                        |
| <i>PtAspAT1_qFw</i>  | GCAGAGGTTGAAGGGTTTGG     | Potri.005G079200/ <i>PtAspAT1/PAT1</i> |
| <i>PtAspAT1_qRv</i>  | TGTAGGGTGGTCAGAGAAGC     |                                        |
| <i>PtAspAT2_qFw</i>  | TCCAACCACCATAACATA       | Potri.006G107100/ <i>PtAspAT2</i>      |
| <i>PtAspAT2_qRv</i>  | CATTCTTGACATCATCCAT      |                                        |
| <i>PtAspAT3_qFw</i>  | GGACAATGAGCCCACGAATTG    | Potri.006G241500/ <i>PtAspAT3</i>      |
| <i>PtAspAT3_qRv</i>  | TCCTCTATTCTCTCCACCACTT   |                                        |
| <i>PtAspAT4_qFw</i>  | GTTGCAGGCAGGGTTGAAAG     | Potri.006G241600/ <i>PtAspAT4</i>      |
| <i>PtAspAT4_qRv</i>  | GGCTTCAAAGAGTTTCTGGCG    |                                        |
| <i>PtAspAT5_qFw</i>  | TGCACGTGGTATGGAGCTTT     | Potri.006G260200/ <i>PtAspAT5</i>      |
| <i>PtAspAT5_qRv</i>  | TCGGGCAATCCTTTTCAGCT     |                                        |
| <i>PtAspAT6_qFw</i>  | TAGCAATGGTGCCAAGCAGA     | Potri.T079800/ <i>PtAspAT6/PAT2</i>    |
| <i>PtAspAT6_qRv</i>  | TCACCCAAAATGGTGCAGGA     |                                        |
| <i>PtAspAT7_qFw</i>  | AGCAATCCTCTGTTCAT        | Potri.014G143300/ <i>PtAspAT7</i>      |
| <i>PtAspAT7_qRv</i>  | CAGCCATTACCTTCACTTC      |                                        |
| <i>PtAspAT8_qFw</i>  | GAAGATGGGCACCTGGTAGG     | Potri.016G133000*/ <i>PtAspAT8</i>     |
| <i>PtAspAT8_qRv</i>  | GCTTTCCCGCAAAGTTGTCC     |                                        |
| <i>PtAspAT9_qFw</i>  | TCCTCCTGTTCATGGGGCTA     | Potri.018G022200/ <i>PtAspAT9</i>      |
| <i>PtAspAT9_qRv</i>  | CCTCCCAGCCATCATTCCA      |                                        |
| <i>PtAspAT10_qFw</i> | CACTGGCTTGAACACTGAACA    | Potri.018G082500/ <i>PtAspAT10</i>     |
| <i>PtAspAT10_qRv</i> | AAAAGATCCCCAGAAGCGGA     |                                        |
| <i>qFW127</i>        | CCGTTCTCTTGATTTTTCAGGGTC | Potri.001G278400/ <i>PtAS1</i>         |
| <i>qRV127</i>        | GTGGGTCATATGGGGTCGAG     |                                        |
| <i>qFW128</i>        | GTGCCCTCTCTGTGTTTT       | Potri.005G075700/ <i>PtAS2</i>         |
| <i>qRV128</i>        | AGATGGGTGAATGATGCTCGT    |                                        |
| <i>qFW129</i>        | AAGCCTTTGACGACGAGGAG     | Potri.009G072900/ <i>PtAS3</i>         |
| <i>qRV129</i>        | TGTCAGTCACATGTTGGGCA     |                                        |
| <i>qFR130</i>        | TGTCAAGTCGGAGCACAATCT    |                                        |

|               |                         |                                   |
|---------------|-------------------------|-----------------------------------|
| <i>qRV130</i> | AAATTCTTTCCTTGTCGCGGG   | Potri.002G122900/ <i>PtAspg1</i>  |
| <i>qFW132</i> | GATGGGCTATAGCGGTGCAT    | Potri.014G022900/ <i>PtAspg2</i>  |
| <i>qRV132</i> | CGAAGAGCAGAGATGCCGAT    |                                   |
| <i>qFW133</i> | GAAGCCAAAAGTCCCAAGCG    | Potri.014G080600/ <i>PtAspg3</i>  |
| <i>qRV133</i> | CCAGGACCCTTGCGAAGAAT    |                                   |
| <i>qFW134</i> | TTGGAGGTCCCACTGGAATG    | Potri.014G191600/ <i>PtAspg4</i>  |
| <i>qRV134</i> | CTTATCGAAGTTTTAGTCGTGCT |                                   |
| <i>qFW135</i> | GACCAGAGCAGAACGGAACA    | Potri.014G191900/ <i>PtAspg5</i>  |
| <i>qRV135</i> | AAAGGCCAGGTGCTCACTAC    |                                   |
| <i>qFW136</i> | TGAGACTCCCAAGGTCTCGT    | Potri.001G253300/ <i>AsnAT1</i>   |
| <i>qRV136</i> | TCTGCATCAGAAGTACCTGTC   |                                   |
| <i>qFW213</i> | ACGCATGGTTTGTGGCATTG    | Potri.001G162800/ <i>PtAlaAT1</i> |
| <i>qRV213</i> | TCCTACCACCTTCGAAAGCC    |                                   |
| <i>qFW214</i> | AATAATACACGCCCCCAGGC    | Potri.003G072600/ <i>PtAlaAT2</i> |
| <i>qRV214</i> | TTCAAGGAACTGACGAGCCG    |                                   |
| <i>qFW215</i> | AGTTGCCGATGGACCTAAGC    | Potri.008G187400/ <i>PtAlaAT3</i> |
| <i>qRV215</i> | AAGCCCTTAGAGGAGGTCGT    |                                   |
| <i>qFW216</i> | TGCAAGCTGTTTCGTGATGC    | Potri.010G045100/ <i>PtAlaAT4</i> |
| <i>qRV216</i> | AAGCTTGAGCTTCTTCACCT    |                                   |
| <i>qFW217</i> | GGGGGCAAGAAAAAGGCAC     | Potri.001G348600/ <i>PtAO1</i>    |
| <i>qRV217</i> | TGATCTCGAGGAGCAACGG     |                                   |
| <i>qFW218</i> | AGCCAAGTTTGGACTGATCG    | Potri.002G236800/ <i>PtAK1</i>    |
| <i>qRV218</i> | CGGACCAGTAAAGTGACCCA    |                                   |
| <i>qFW219</i> | TGATACAGCCATCTCATCGTG   | Potri.014G145700/ <i>PtAK2</i>    |
| <i>qRV219</i> | AACAATGGCCCAAAGGTTAGA   |                                   |
| <i>qFW220</i> | TCAAAGCAAGGGCTGTCTGC    | Potri.013G099500/ <i>PtHSDH.1</i> |
| <i>qRV220</i> | TAGGAGAGGTTCCGCTAGGA    |                                   |
| <i>qFW221</i> | CGCGAGCATTTAGTGACGTG    | Potri.019G071700/ <i>PtHSDH.2</i> |
| <i>qRV221</i> | GCTCTCAGTGGTTGAGGGAC    |                                   |
| <i>qFW222</i> | CAGCGGATGTTTTGTCAAGCA   | Potri.008G020200/ <i>PtASS1</i>   |
| <i>qRV222</i> | GGCCTCCTGGTGAGAGATTG    |                                   |
| <i>qFW223</i> | TGACAAGCAGGGTACTTGGG    | Potri.010G239000/ <i>PtASS2</i>   |
| <i>qRV223</i> | CCACATGCACAAGAATCCGA    |                                   |
| <i>qFWATC</i> | GGTCCTGGACAACATCCAC     | Potri.001G357200/ <i>PtATC</i>    |
| <i>qRVATC</i> | GCGGACTGTCTCCCATTAG     |                                   |
